# Supplementary material
Source: PubMed Central journal article supplement (PMC3063487)

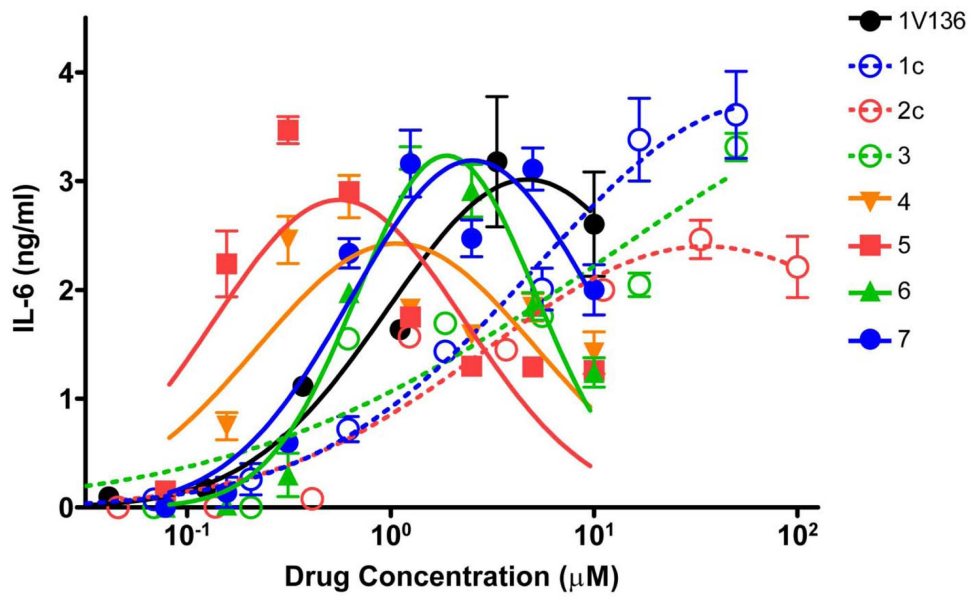

177x112mm (300 x 300 DPI)

Supplement: NIHMS275457-supplement-1_si_001.pdf [file NIHMS275457-supplement-1_si_001.pdf]
